# Supplementary material
Source: HighWire-hosted journal article supplement (https://bmjopen.bmj.com/content/10/7/e037043)
Supplement: inline-supplementary-material-1 [file inline-supplementary-material-1.pdf]

Supplementary file 1: Interview Guide

**Translation of research question for the participants in the focus groups:**

What should general practitioners (GPs) and medical specialists know and do to effectively realise shared care for you?

**Introduction**

What's your name? (Focus group (FG) 1-5)

What medical specialists are treating you at the hospital or in the outpatient clinic? (FG 1-5)

**Opening question**

What are your experiences with collaboration between GPs and medical specialists? (FG 1-5)

Could you explain your experiences? (FG 1-5)

**Transition questions**

What is important for you in the collaboration between GPs and medical specialists? (FG 1-5)

In previous focus groups, we heard that collaboration is often not visible for patients. Do you recognise this? How do you feel about this? Why? Should this be changed and, if so, how could it be changed? (added in FG 3-5)

**Key questions**

What, in your view, would perfect collaboration between GPs and medical specialists look like in the future? (added in FG 3-5)

What skills should doctors learn to achieve this? (FG 1-5)

What are doctors already doing well? (FG 1-5)

What should doctors never do in collaboration? (FG 1-5)

What other things would doctors have to learn about collaboration if they are to realise better care for you? (FG 1-5)

What could doctors learn from each other about collaboration? (added in FG 4,5)

Do you feel that GPs and medical specialists have sufficient knowledge of each other's abilities? (added in FG 4,5)

Participants mentioned the role they could take in their collaborative process, for example, reading and correcting letters between GPs and medical specialists. Please share your view of your own role in the collaborative process. (added in FG 4,5)

In previous focus groups, it was mentioned that if GPs and medical specialists knew each other personally, this could improve collaboration. How do you feel about that? (added in FG 4,5)

If you could talk with doctors who just started specialty training, what would you like to say to them? What should they learn about collaboration during their training? (FG 1-5)

**Ending**

Summarise and check.
